# Supplementary material
Source: PubMed Central journal article supplement (PMC5866979)
Supplement: BPH-175-1205-s001.pdf [file BPH-175-1205-s001.pdf]

**Early treatment with Resolvin E1 facilitates myocardial recovery from ischemia in mice**

Guizhu Liu et al

**SUPPLEMENTARY INFORMATION**

**Table S1: Primers used for RT-PCR analysis**

| <b>Gene</b>   | <b>Sense</b>              | <b>Anti-sense</b>       |
|---------------|---------------------------|-------------------------|
| GAPDH         | CCCTTATTGACCTCAACTACATGGT | GAGGGGCCATCCACAGTCTTCTG |
| IL-4          | ACGGAGATGGATGTGCCAAAC     | AGCACCTTGGGAAGCCCTACAGA |
| IL-6          | TCTCTGGGAAATCGTGAAAA      | GATGGTCTTGGTCCTTAGCC    |
| IL-1 $\alpha$ | CGAAGACTACAGTTCTGCCATT    | GACGTTTCAGAGTTCTCAGAG   |
| IL-1 $\beta$  | GCAACTGTTCCCTGAACTCAACT   | ATCTTTTGGGGTCCGTCAACT   |
| TNF- $\alpha$ | ACGGCATGGATCTCAAAGAC      | CGGACTCCGCAAAGTCTAAG    |
| INF- $\gamma$ | ATGAACGCTACACACTGCATC     | CCATCCTTTTGCCAGTTCCTC   |
| VEGF-A        | GGGAGTCTGTGCTCTGGGAT      | GGTGTCTGTCTGTCTGTCCG    |
| VEGF-B        | GCCAGACAGGGTTGCCATAC      | GGAGTGGGATGGATGATGTCAG  |
| VEGF-C        | GAGGTCAAGGCTTTTGAAGGC     | CTGTCCTGGTATTGAGGGTGG   |
| TGF- $\beta$  | CTCCCGTGGCTTCTAGTGC       | GCCTTAGTTTGGACAGGATCTG  |
| VEGF          | GGGAGTCTGTGCTCTGGGAT      | GGTGTCTGTCTGTCTGTCCG    |
| FGF           | CTGCTGGGGGTCTACCAAG       | CTGCGCCTACCACTGTTC      |
| HGF           | AGGTGACCTTTGCTTTCCCG      | ACGTAAAGCCCCTGTTCCCTG   |
| PDGF          | GGCGAGCGAGTGGGTAGATA      | TCCAAAGTTGGCTTTGCAGC    |
| BLT1          | ATGGCTGCAAACACTACATCTC    | GACCGTGCGTTTCTGCATC     |
| ChemR23       | ATGGAGTACGACGCTTACAACG    | GGTGGCGATGACAATCACCA    |
| CTGF          | GGGCCTCTTCTGCGATTTTC      | ATCCAGGCAAGTGCATTGGTA   |
| Collagen I    | GCTCCTCTTAGGGGCCACT       | CCACGTCTCACCATTGGGG     |
| Collagen III  | CTGTAACATGGAACTGGGGAAA    | CCATAGCTGAACTGAAAACCACC |
| Fibronectin   | ATGTGGACCCCTCCTGATAGT     | GCCCAGTGATTTCAGCAAAGG   |
| AngiotensinII | AACAGCTTGGTGGTGATCGTC     | CATAGCGGTATAGACAGCCCA   |
| Osteopontin   | AGCAAGAACTCTTCCAAGCAA     | GTGAGATTCGTCAGATTCATCCG |

**Table S2: Effect of RvE1 treatment during different periods on cardiac healing after MI in mice**

|                   | LV Vol;d<br>( $\mu$ L) | LV Vol;s<br>( $\mu$ L) | EF<br>(%)        | FS<br>(%)       | LV Mass (AW)<br>(mg) |
|-------------------|------------------------|------------------------|------------------|-----------------|----------------------|
| <b>RvE1(1-14)</b> |                        |                        |                  |                 |                      |
| PBS (day3)        | 75.4 $\pm$ 3.8         | 51 $\pm$ 3.2           | 31.0 $\pm$ 2.7   | 14.3 $\pm$ 1.3  | 114.3 $\pm$ 6.9      |
| RvE1(day3)        | 66.3 $\pm$ 2.4*        | 39.1 $\pm$ 2.2*        | 40.2 $\pm$ 1.4*  | 19.5 $\pm$ 0.9* | 104.1 $\pm$ 3.8*     |
| PBS (day7)        | 77.9 $\pm$ 8.2         | 60.7 $\pm$ 6           | 23.5 $\pm$ 4.24  | 10.6 $\pm$ 3.9  | 109.9 $\pm$ 10.3     |
| RvE1 (day7)       | 66.3 $\pm$ 4.4*        | 51.8 $\pm$ 3.9*        | 33.3 $\pm$ 3.14* | 15.7 $\pm$ 1.8* | 95.1 $\pm$ 8.0*      |
| PBS (day14)       | 70.4 $\pm$ 5.6         | 50.6 $\pm$ 2.6         | 27.9 $\pm$ 1.8   | 13.3 $\pm$ 0.9  | 117.8 $\pm$ 5.2      |
| RvE1 (day14)      | 56.8 $\pm$ 4.2*        | 44.4 $\pm$ 4.0*        | 21.9 $\pm$ 3.0*  | 9.7 $\pm$ 1.7 * | 126.3 $\pm$ 7.5*     |
| <b>RvE1(1-3)</b>  |                        |                        |                  |                 |                      |
| PBS (day3)        | 73 $\pm$ 2.6           | 48.0 $\pm$ 1.8         | 34.0 $\pm$ 1.5   | 16.2 $\pm$ 1.1  | 125.3 $\pm$ 4.8      |
| RvE1 (day3)       | 66.3 $\pm$ 2.8*        | 39.3 $\pm$ 1.6*        | 40.6 $\pm$ 1.3*  | 19.6 $\pm$ 2.0* | 104.2 $\pm$ 3.6*     |
| PBS (day7)        | 72.5 $\pm$ 3.2         | 54.4 $\pm$ 2.3         | 24.5 $\pm$ 1.5   | 11.4 $\pm$ 1.3  | 129.9 $\pm$ 3.6      |
| RvE1 (day7)       | 64.5 $\pm$ 3.6*        | 43.2 $\pm$ 2.8*        | 31.7 $\pm$ 1.9*  | 15.2 $\pm$ 1.8* | 105.4 $\pm$ 6.2*     |
| PBS (day14)       | 67.4 $\pm$ 3.4         | 47.2 $\pm$ 2.8         | 30.5 $\pm$ 2.2   | 13.9 $\pm$ 1.0  | 110.9 $\pm$ 5.8      |
| RvE1 (day14)      | 61.1 $\pm$ 1.6*        | 38.2 $\pm$ 1.5*        | 36.6 $\pm$ 1.1*  | 17.7 $\pm$ 1.3* | 92.4 $\pm$ 3.2*      |
| <b>RvE1(3-14)</b> |                        |                        |                  |                 |                      |
| PBS (day3)        | 69.7 $\pm$ 1.2         | 46.2 $\pm$ 1.3         | 33.7 $\pm$ 0.9   | 15.8 $\pm$ 1.0  | 105.23 $\pm$ 3.5     |
| RvE1(day3)        | 68.9 $\pm$ 1.4         | 48.0 $\pm$ 1.4         | 33.9 $\pm$ 1.0   | 16.3 $\pm$ 0.8  | 110.7 $\pm$ 3.0      |
| PBS (day7)        | 76.5 $\pm$ 3.5         | 58.4 $\pm$ 3.2         | 23.2 $\pm$ 2.0   | 11.36 $\pm$ 1.8 | 129.9 $\pm$ 7.6      |
| RvE1 (day7)       | 84.8 $\pm$ 2.8*        | 51.2 $\pm$ 2.9*        | 29.3 $\pm$ 1.7*  | 13.4 $\pm$ 2.6* | 112.6 $\pm$ 10.2*    |
| PBS (day14)       | 72.0 $\pm$ 1.6         | 49.6 $\pm$ 2.2         | 33.0 $\pm$ 1.1   | 15.6 $\pm$ 1.5  | 110.3 $\pm$ 6.7      |
| RvE1 (day14)      | 80.0 $\pm$ 2. 8*       | 61.7 $\pm$ 4.4 *       | 24.0 $\pm$ 1.6*  | 11.0 $\pm$ 1.1* | 126.5 $\pm$ 9.6*     |
| <b>RvE1(1-7)</b>  |                        |                        |                  |                 |                      |
| PBS (day3)        | 72.4 $\pm$ 2.9         | 47.4 $\pm$ 3.1         | 32.6 $\pm$ 1.7   | 15.2 $\pm$ 2.5  | 120.8 $\pm$ 8.9      |
| RvE1(day3)        | 60.9 $\pm$ 4.2*        | 38.7 $\pm$ 4.8*        | 39.9 $\pm$ 2.4*  | 19.2 $\pm$ 1.6* | 108.6 $\pm$ 7.3*     |
| PBS (day7)        | 79.4 $\pm$ 4.8         | 58.2 $\pm$ 6.1         | 25.1 $\pm$ 3.1   | 12.9 $\pm$ 2.3  | 129.9 $\pm$ 9.6      |
| RvE1(day7)        | 70.9 $\pm$ 1.4*        | 45.3 $\pm$ 1.8*        | 36.5 $\pm$ 0.8*  | 16.8 $\pm$ 0.9* | 110.5 $\pm$ 5.2*     |
| PBS (day14)       | 79.2 $\pm$ 3.0         | 54.4 $\pm$ 3.4         | 30.7 $\pm$ 1.4   | 14.6 $\pm$ 2.3  | 125.6 $\pm$ 7.3      |
| RvE1(day14)       | 69.6 $\pm$ 3.6*        | 40.6 $\pm$ 4.0*        | 39.6 $\pm$ 1.5*  | 19.6 $\pm$ 1.8* | 114.0 $\pm$ 6.9*     |
| <b>RvE1(7-14)</b> |                        |                        |                  |                 |                      |
| PBS (day3)        | 79.8 $\pm$ 4.9         | 56.7 $\pm$ 5.8         | 30.6 $\pm$ 2.1   | 15.8 $\pm$ 3.3  | 129.2 $\pm$ 7.9      |
| RvE1 (day3)       | 76.6 $\pm$ 4.5         | 53.8 $\pm$ 5.3         | 33.7 $\pm$ 2.5   | 16.1 $\pm$ 1.9  | 125.3 $\pm$ 8.3      |
| PBS (day7)        | 79.4 $\pm$ 5.4         | 63.5 $\pm$ 5.0         | 23.6 $\pm$ 2.1   | 9.8 $\pm$ 2.5   | 130.7 $\pm$ 8.8      |
| RvE1 (day7)       | 75.6 $\pm$ 6.3         | 58.6 $\pm$ 6.5         | 25.1 $\pm$ 2.8   | 11.8 $\pm$ 3.5  | 129.2 $\pm$ 9.6      |
| PBS (day14)       | 79.2 $\pm$ 5.9         | 54.4 $\pm$ 6.0         | 29.3 $\pm$ 2.8   | 14.6 $\pm$ 3.2  | 120.7 $\pm$ 8.7      |
| RvE1 (day14)      | 87.5 $\pm$ 4.3*        | 74.9 $\pm$ 4.5*        | 19.7 $\pm$ 1.7*  | 10.3 $\pm$ 2.6* | 141.0 $\pm$ 8.0*     |

LV Vol;d: left ventricular diastolic volume; LV Vol;s: left ventricular systolic volume; EF: Ejection Fraction; FS: Fractional Shortening; LV Mass: left ventricular mass. Data are expressed as mean  $\pm$  SEM(\* $P < 0.05$ , vs. PBS group; animal numbers are indicated in Figure 1)

## Figure S1

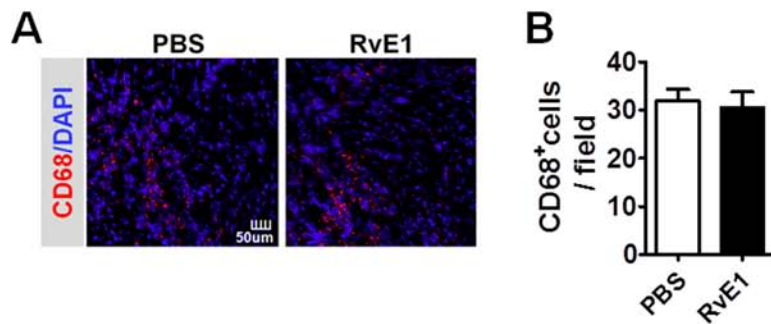

**Figure S1.** Effect of early treatment of RvE1 (day 1-7) on CD68<sup>+</sup> cell recruitment in hearts on day 14 after MI. (A) Representative CD68<sup>+</sup> inflammatory cell immunofluorescence images of infarcted hearts from RvE1-treated (day 1-7) mice on day 14 after MI. Scale bar, 50 μm. (B) Quantification of CD68<sup>+</sup> inflammatory cells from A (mean ± SEM; PBS, n=6; RvE1, n=6).

# Figure S2

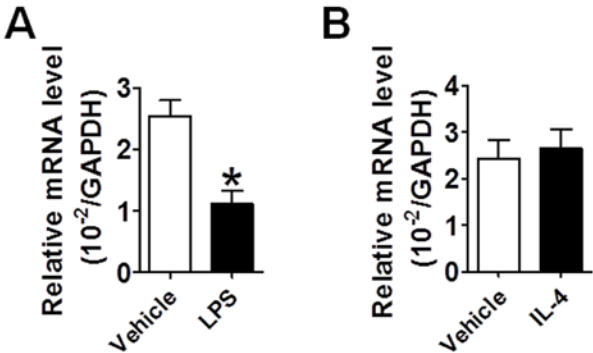

**Figure S2.** ChemR23 expression levels in LPS-treated (A) and IL-4-treated (B) murine Mps. ChemR23 expression were analyzed by RT-PCR (mean  $\pm$  SEM, n=6; \*,  $P < 0.05$ ).

**Figure S3**

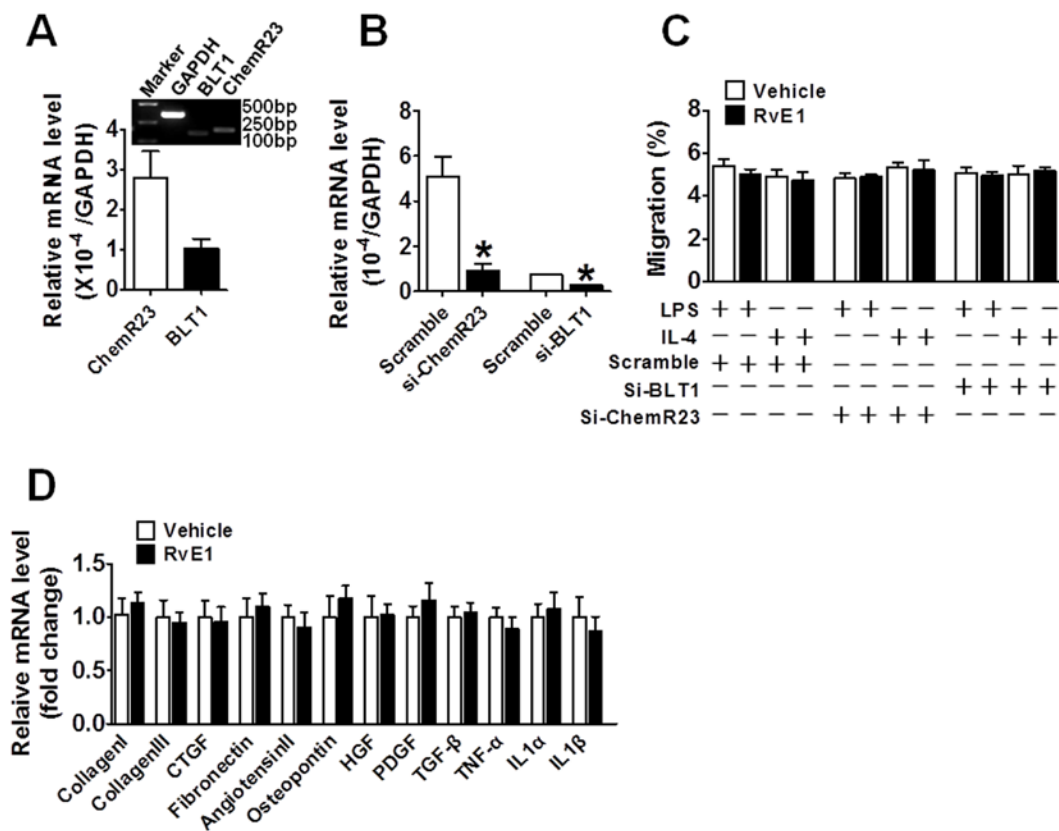

**Figure S3.** Effect of knock down of ChemR23 or BLT1 in cardiac fibroblasts on Mo/Mp migration. (A) Relative mRNA levels of ChemR23 and BLT1 in cardiac fibroblasts (ChemR23, n=6; BLT1, n=6). (B) Knockdown efficiency of BLT1 and ChemR23 in cardiac fibroblasts by siRNAs. Data are normalized to GAPDH levels (\**P*<0.05 vs. Scramble siRNA; Scramble, n=5; si-ChemR23, n=5; si-BLT1, n=5). (C) Mp transmembrane migration in co-culture with cardiac fibroblasts pretreated with si-ChemR23 or si-BLT1 (n=6). (D) Effect of RvE1 treatment on expression of matrix protein and cytokine mRNA in cardiac fibroblasts (n=6). All plotted values are means ± SEM.
